# Supplementary material for: A Dietary Supplement Containing Micronutrients, Phosphatidylserine, and Docosahexaenoic Acid Counteracts Cognitive Impairment in D-Galactose-Induced Aged Rats
Source: Frontiers journal article supplement (doi:10.3389/fnut.2022.931734), 2022-07-05
Supplement: Presentation_1.pdf [file Presentation_1.pdf]

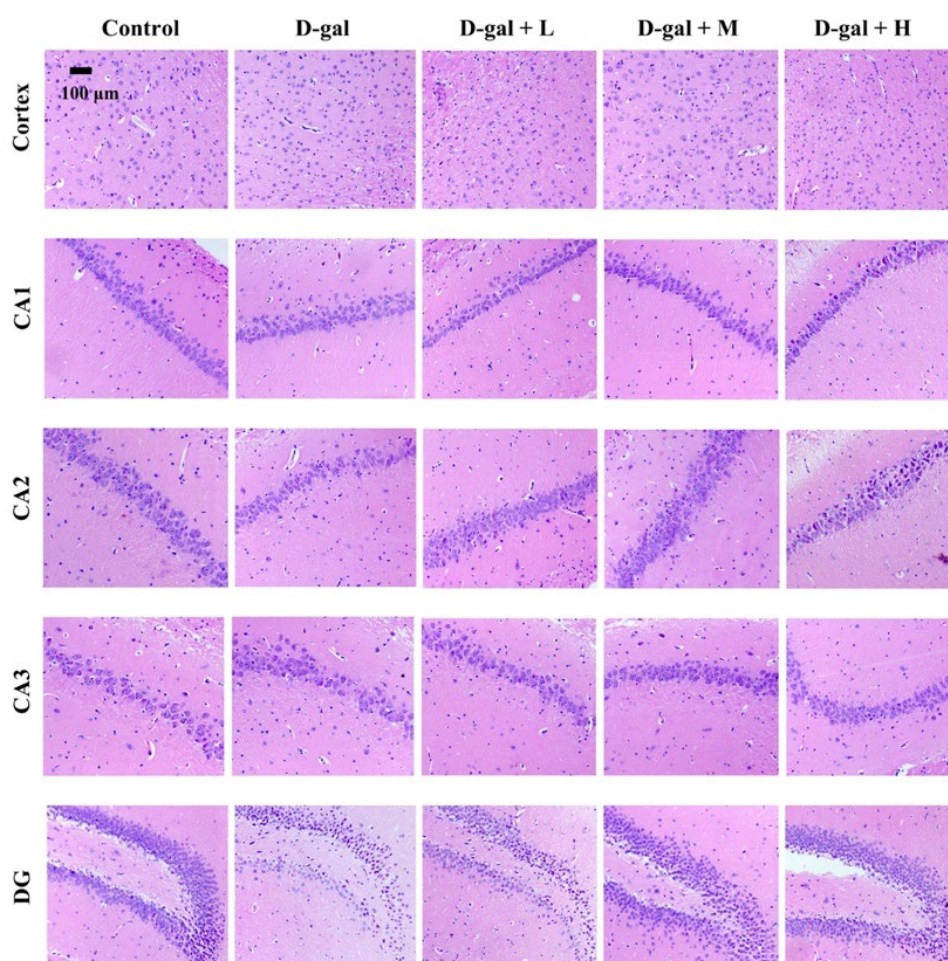

**Supplementary Figure 1.** The representative photomicrographs of H&E staining in the cortex, CA1-3, and DG region of the hippocampus.

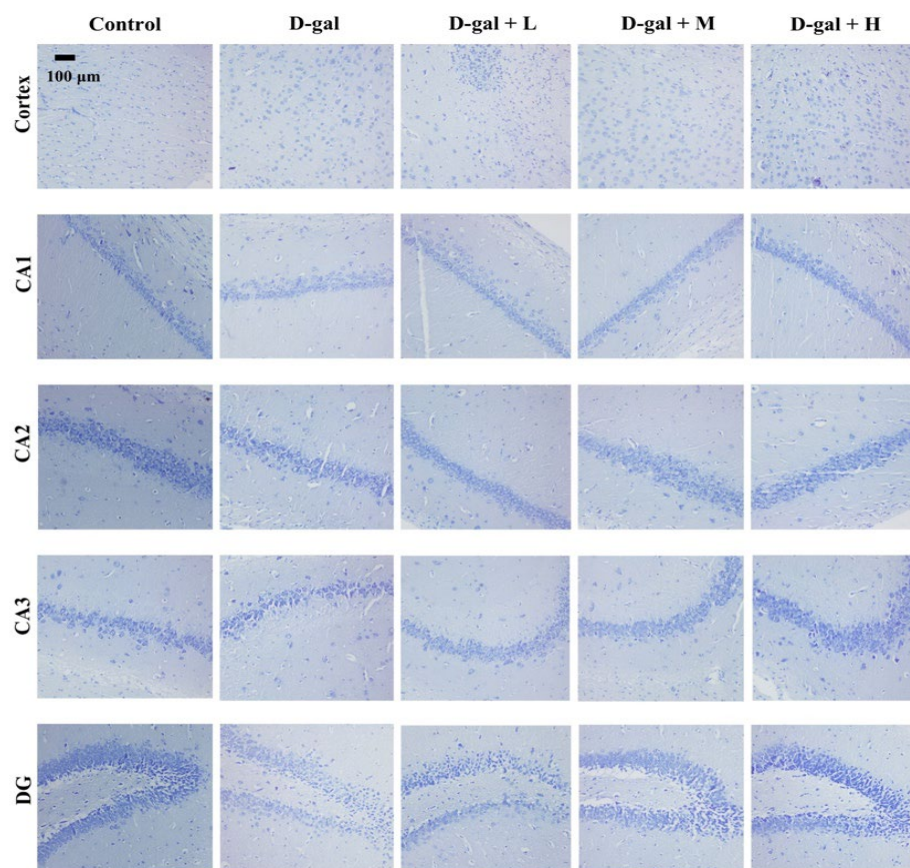

**Supplementary Figure 2.** The representative photomicrographs of Nissl staining in the cortex, CA1-3, and DG region of the hippocampus.

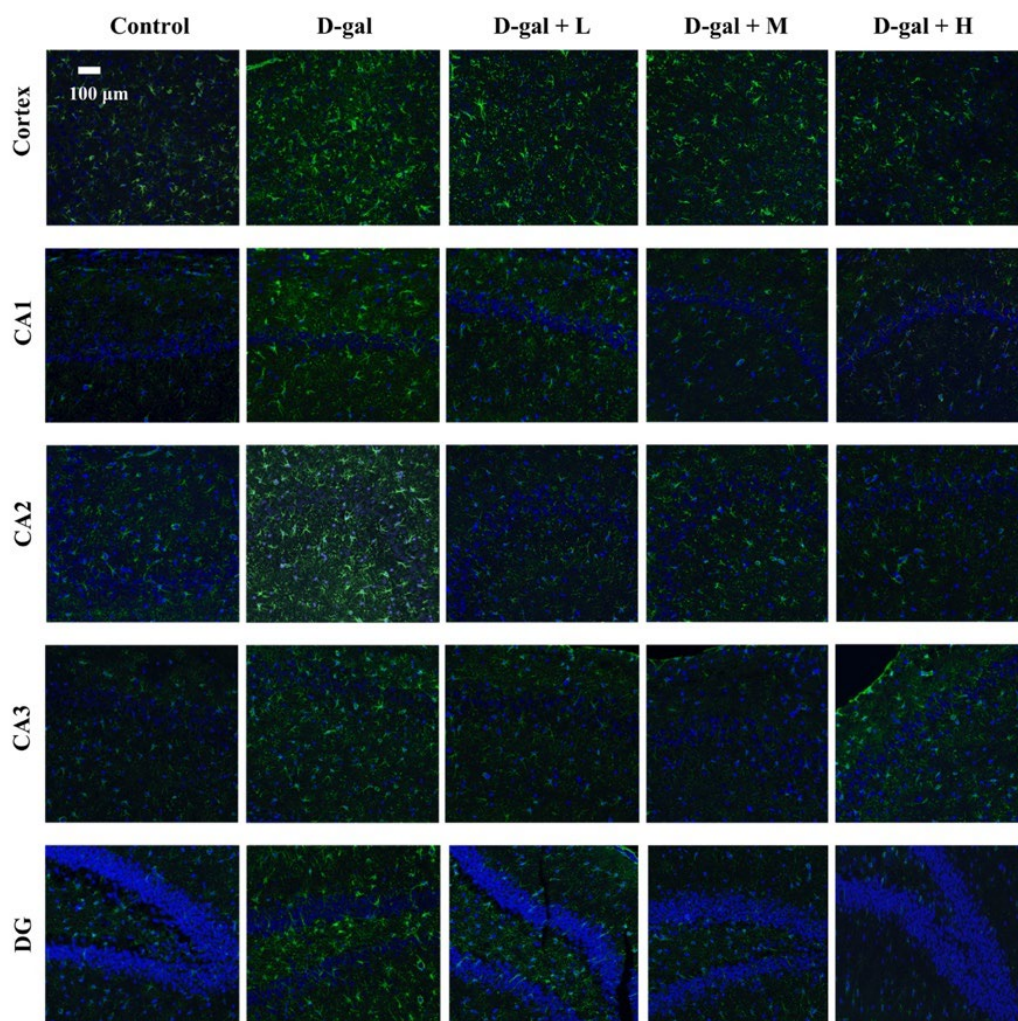

**Supplementary Figure 3.** The representative photomicrographs of immunofluorescence staining in the cortex, CA1-3, and DG region of the hippocampus.
